# Supplementary material for: Nampt controls skeletal muscle development by maintaining Ca2+ homeostasis and mitochondrial integrity
Source: PubMed Central journal article supplement — Mol Metab. 2021 Jun 11;53:101271. doi: 10.1016/j.molmet.2021.101271 (PMC8259345; doi:10.1016/j.molmet.2021.101271), 2021-06-11
Supplement: mmc1.pdf [file mmc1.pdf]

# Figure S1

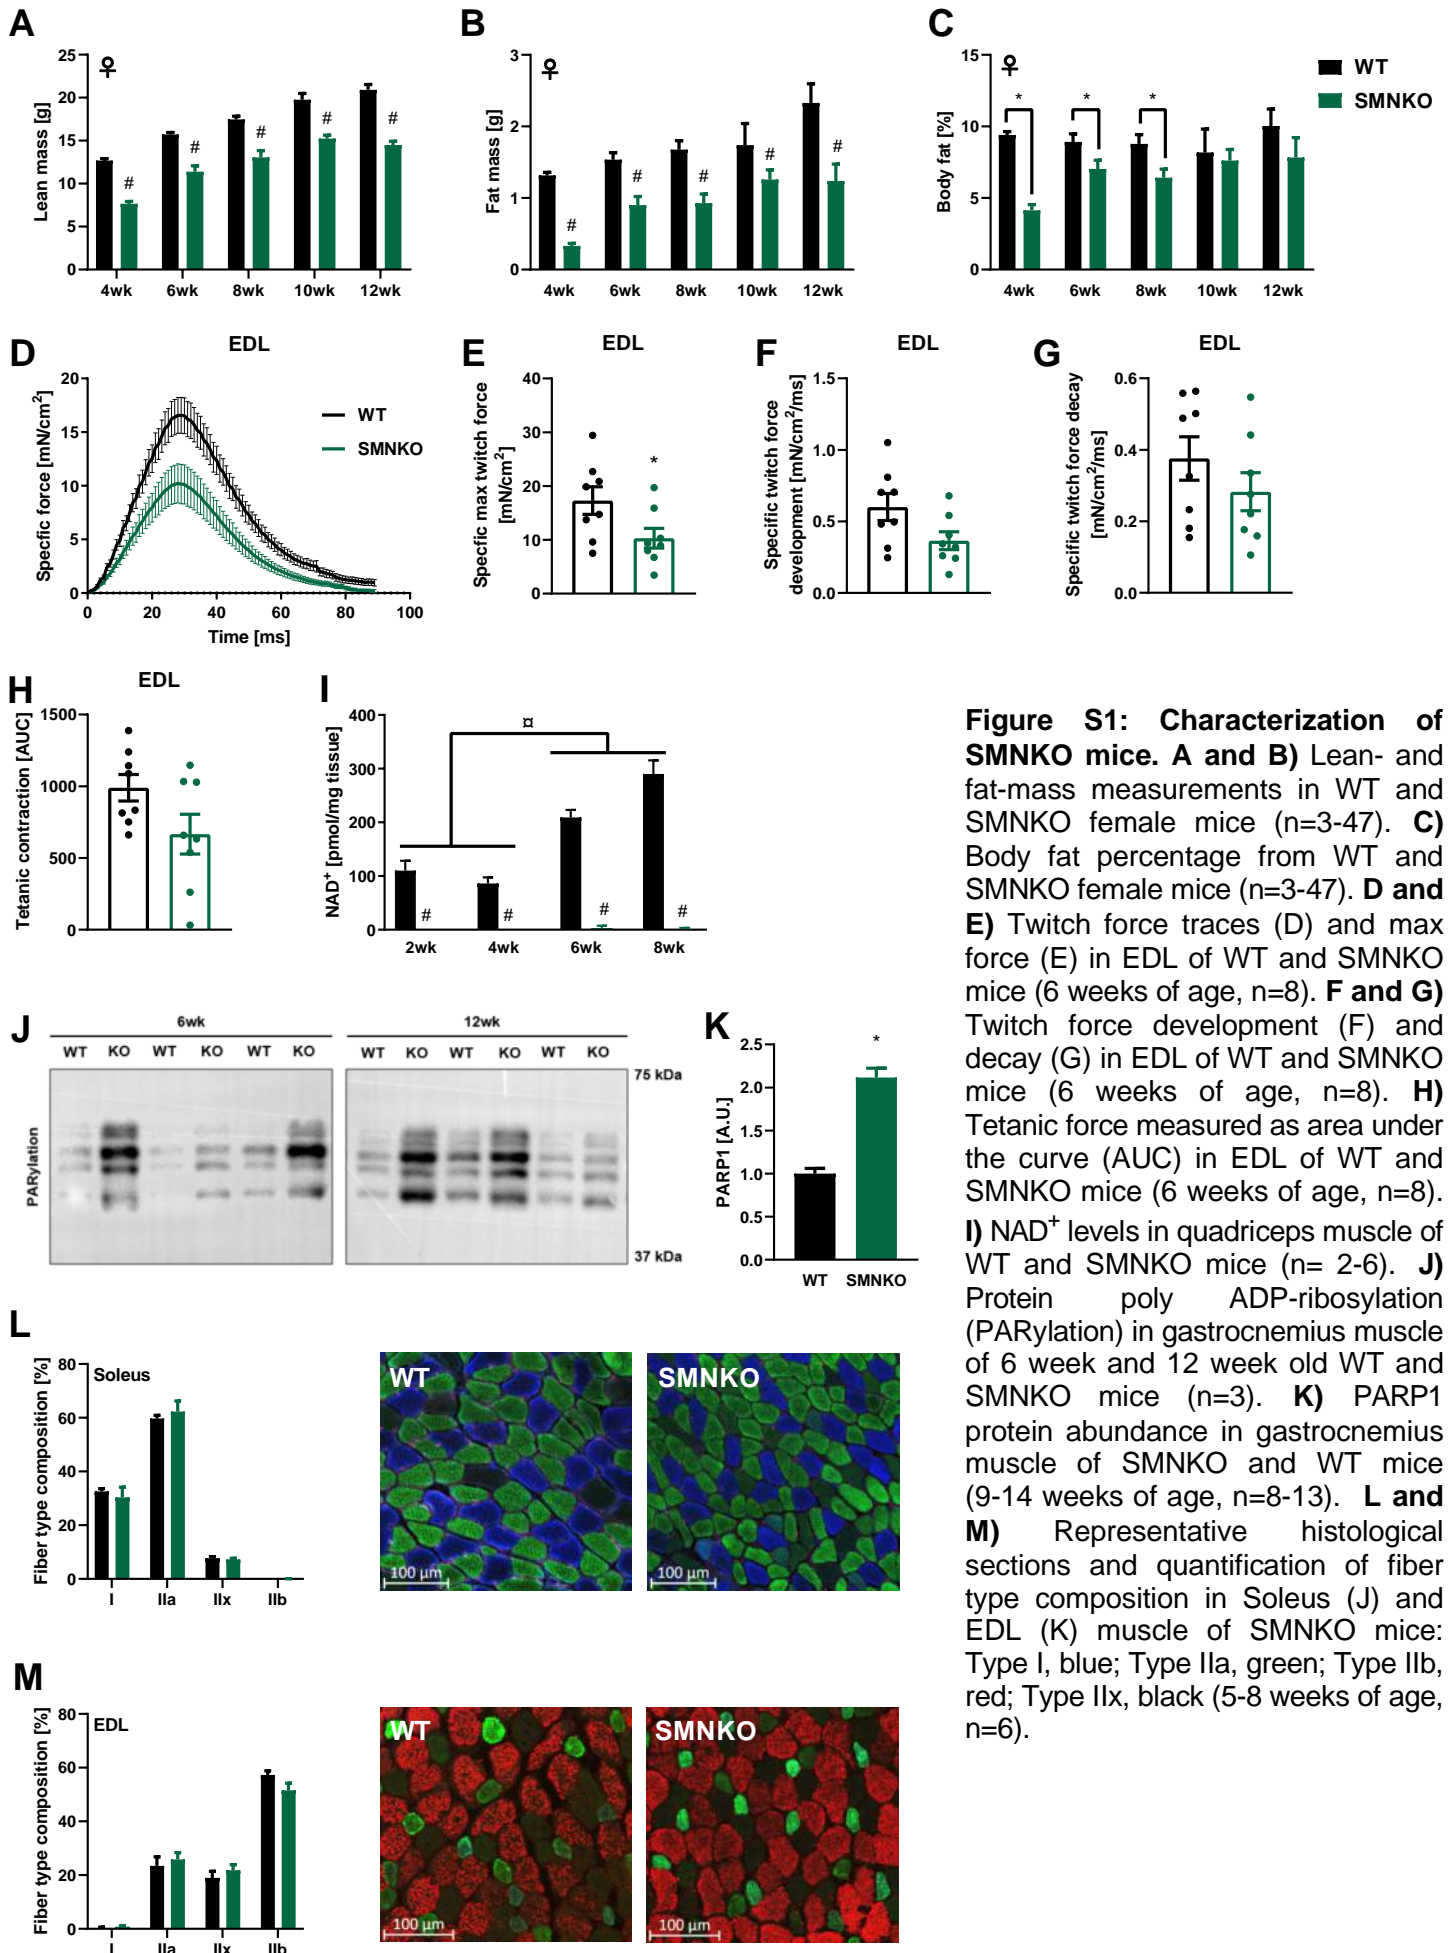

# Figure S2

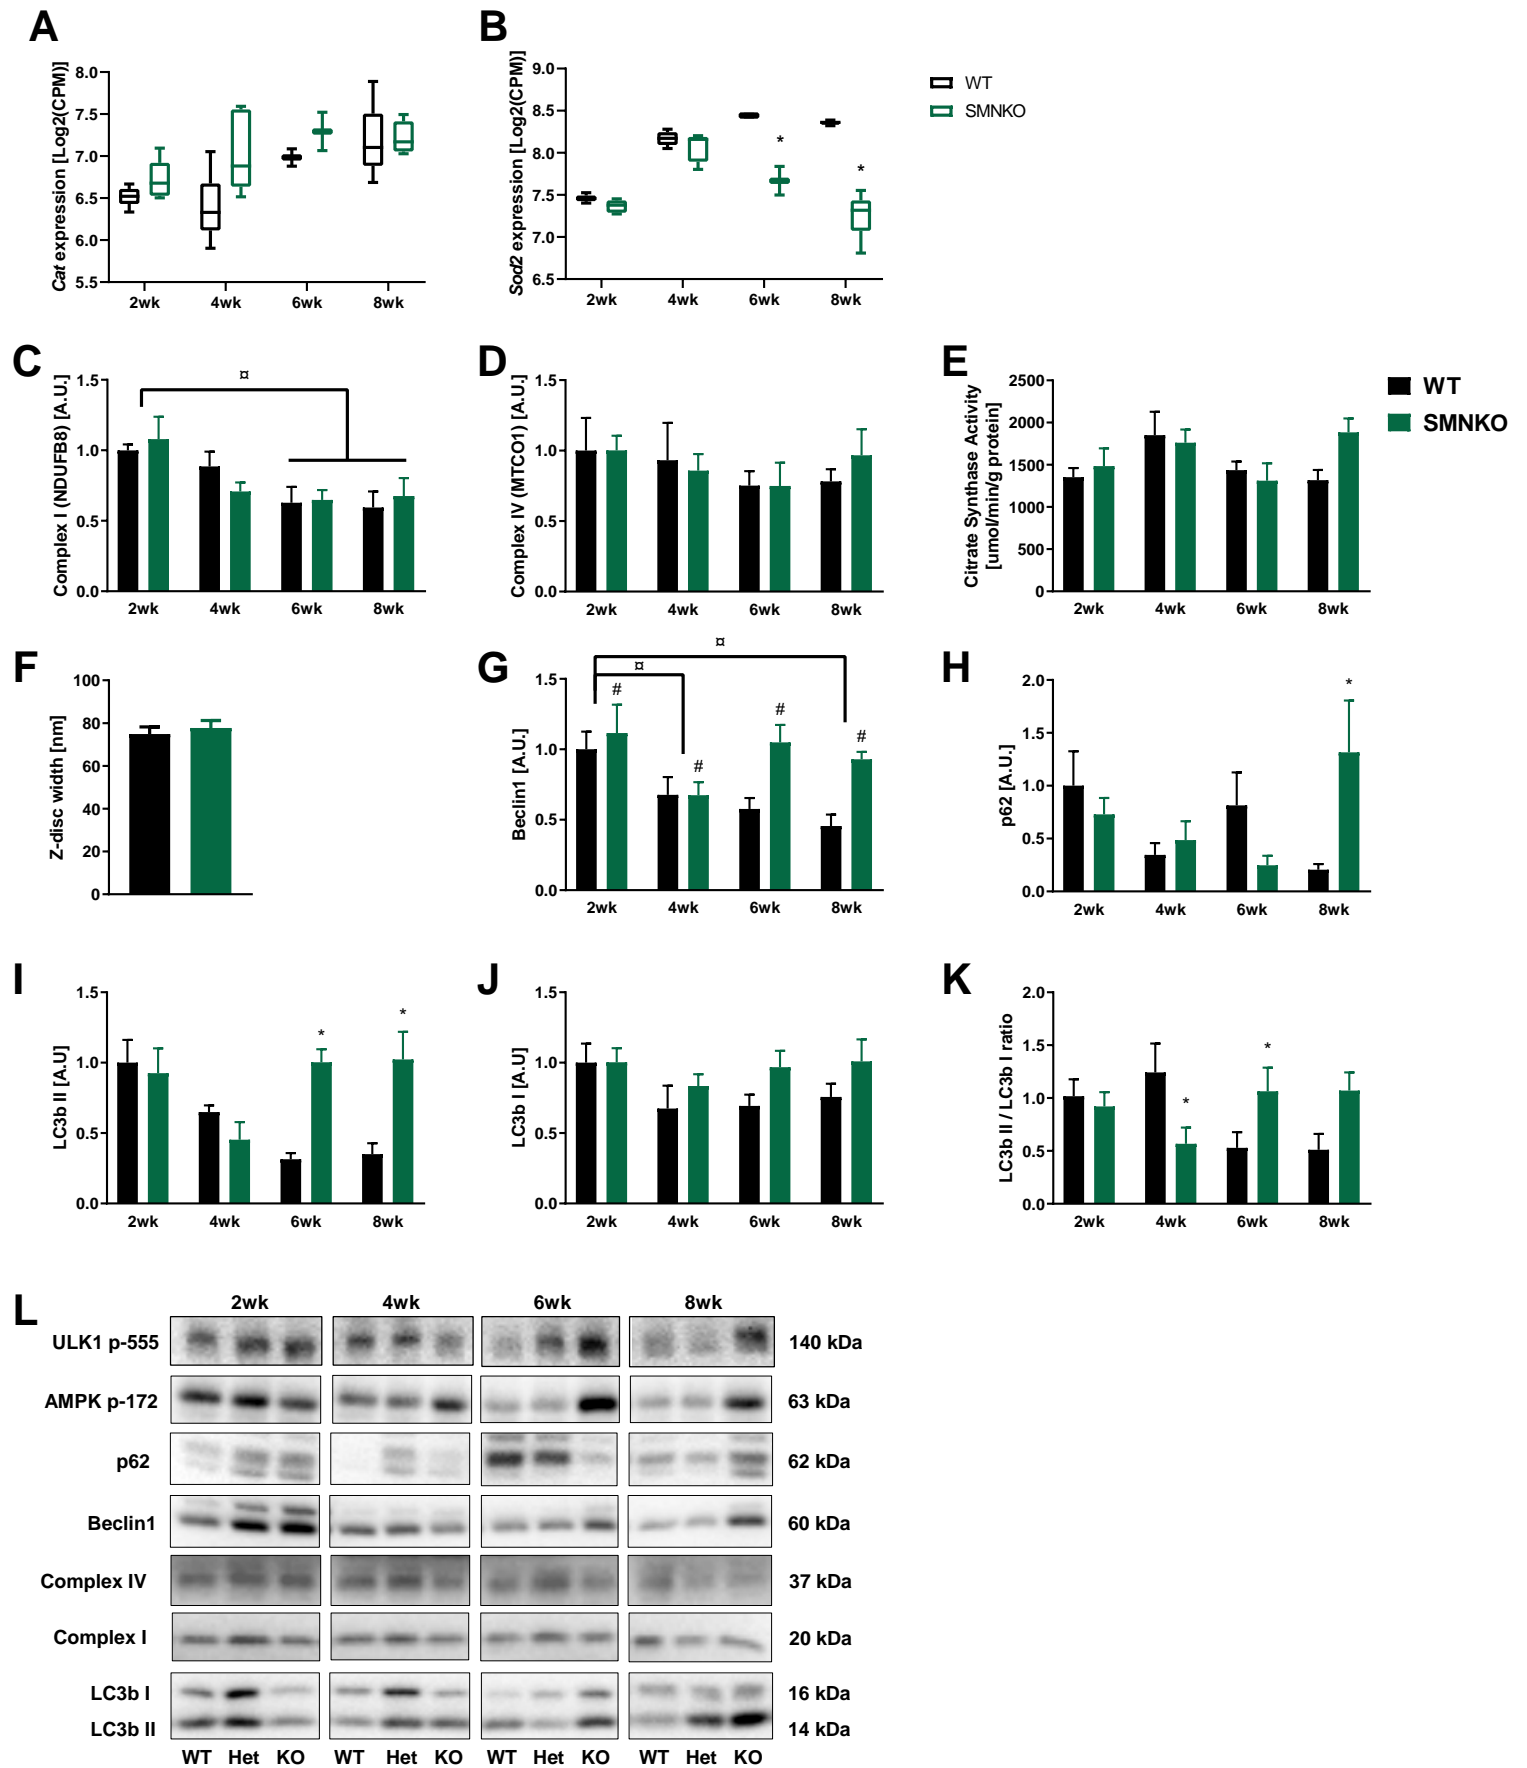

**Figure S2: Namp1 knockout increases autophagy in skeletal muscle.** **A and B**) Expression of *Cat* (A) and *Sod2* (B) based on RNA sequencing data from gastrocnemius muscle of WT and SMNKO mice (n=2-6). **C and D**) Protein levels of Complex I (NDUFB8) (C) and Complex IV (MTCO1) (D) in quadriceps muscle of WT and SMNKO mice (n= 2-6). **E**) Citrate synthase activity in quadriceps muscle of WT and SMNKO mice (n= 2-6). **F**) Quantification of z-disk thickness in quadriceps muscles of WT and SMNKO male mice, (5-8 weeks of age, n=6). **G and H**) Protein levels of Beclin 1 (G) and p62 (H) in quadriceps muscle of WT and SMNKO mice (n= 2-6). **I and J**) Protein levels of LC3b II (I) and LC3b I (J) in quadriceps muscle of WT and SMNKO mice (n= 2-6). **K**) LC3b II/LC3b I ratio in quadriceps muscle of WT and SMNKO mice (n= 2-6). **L**) Representative Western blots of ULK1-p555, AMPK-p172, p62, Beclin 1, Complex I (NDUFB8), Complex IV (MTCO1), LC3b I and LC3b II in quadriceps muscle of WT and SMNKO mice at 2, 4, 6, and 8 weeks of age. Error bars represent SEM. \* Difference to WT control of the same age. # Main effect of genotype. □ Main effect of time.

# Figure S3

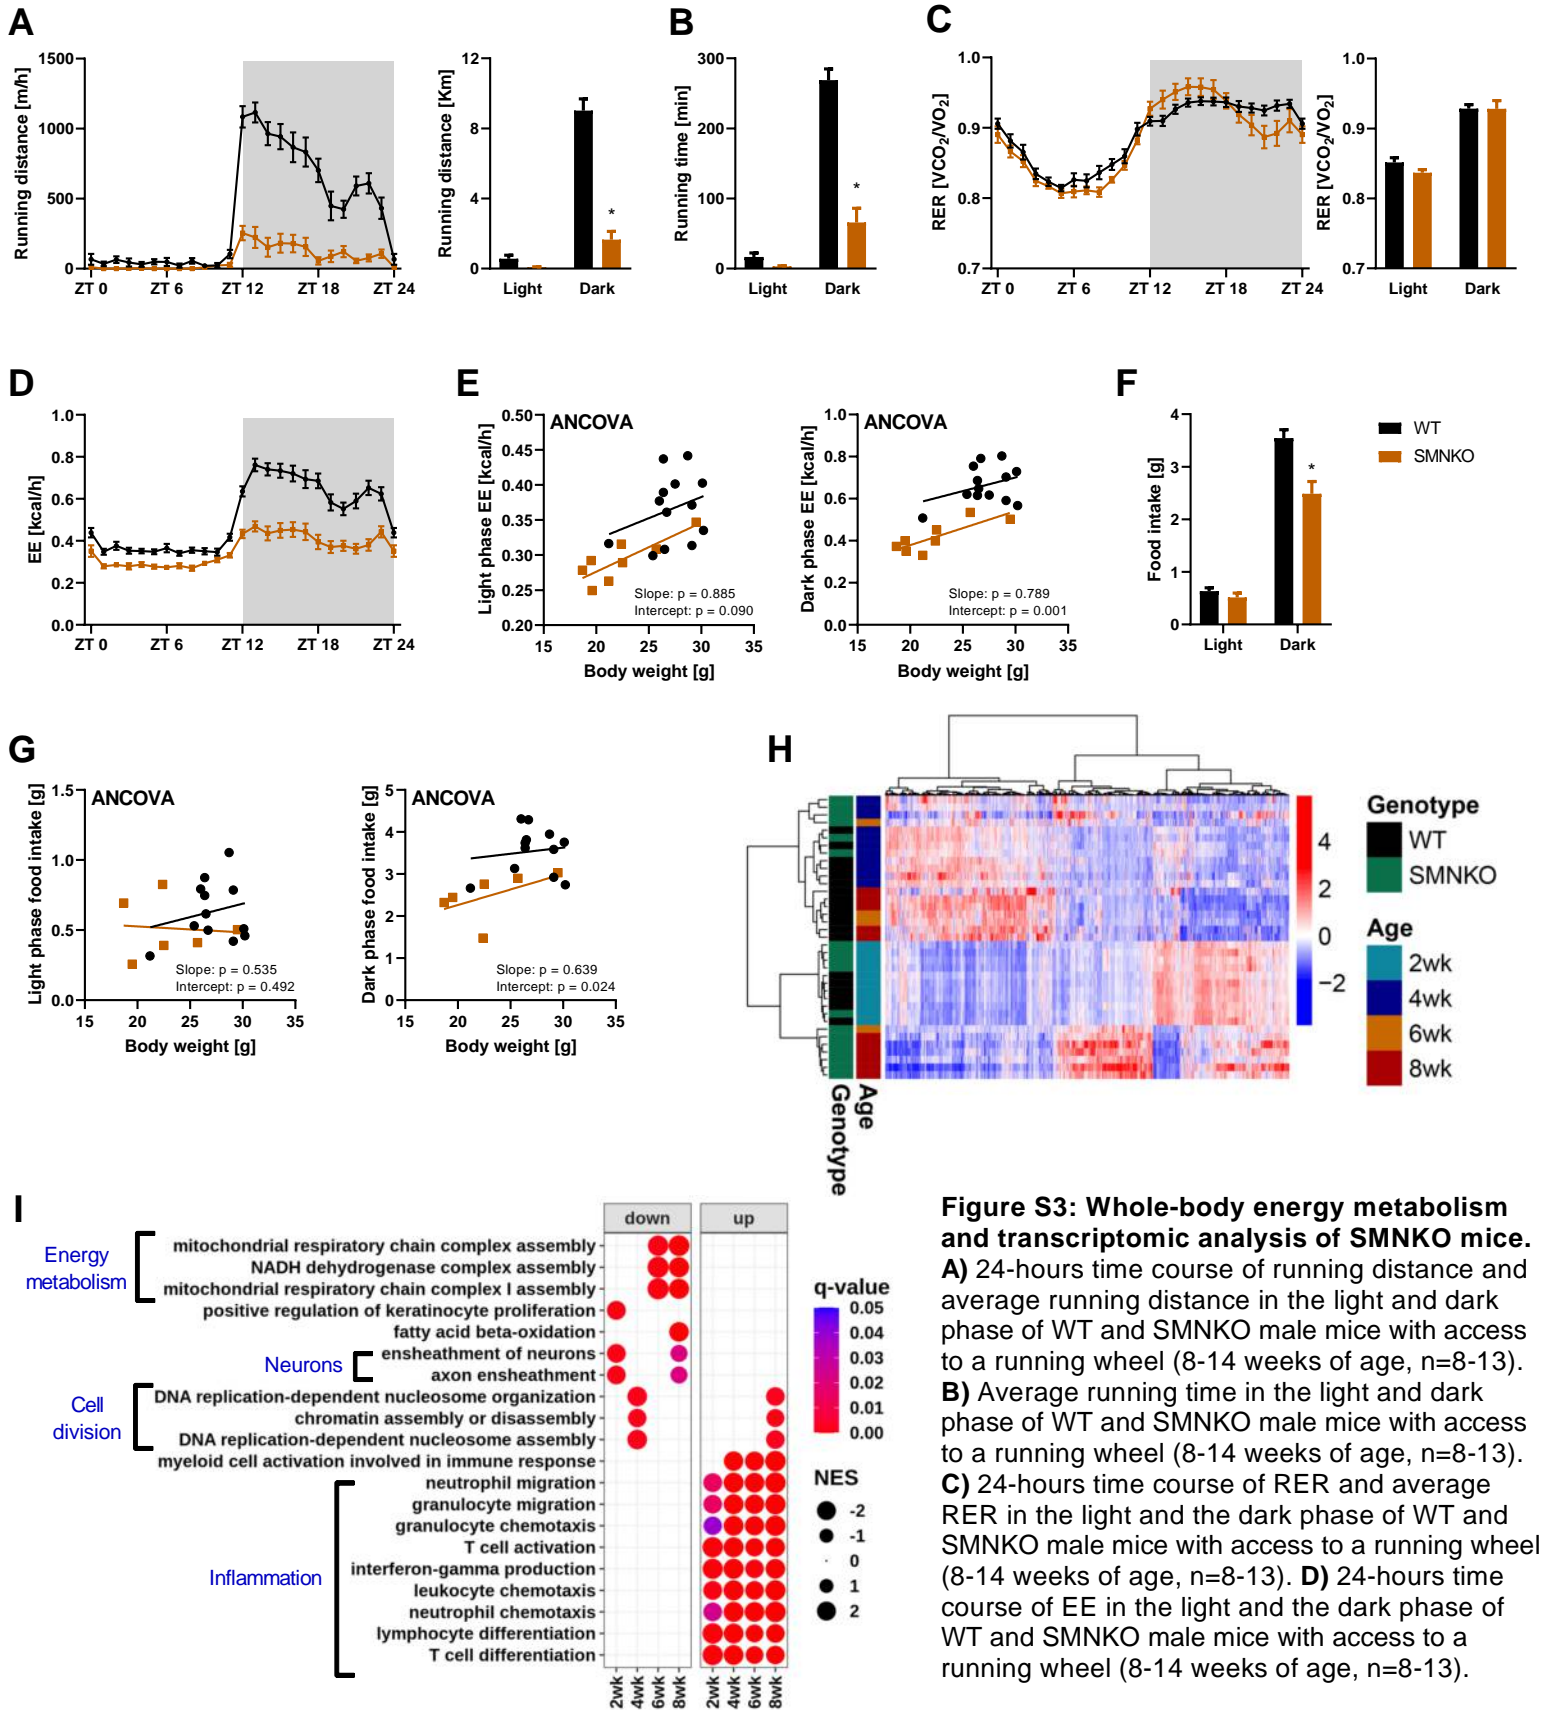

**Figure S3: Whole-body energy metabolism and transcriptomic analysis of SMNKO mice.** **A)** 24-hours time course of running distance and average running distance in the light and dark phase of WT and SMNKO male mice with access to a running wheel (8-14 weeks of age, n=8-13). **B)** Average running time in the light and dark phase of WT and SMNKO male mice with access to a running wheel (8-14 weeks of age, n=8-13). **C)** 24-hours time course of RER and average RER in the light and the dark phase of WT and SMNKO male mice with access to a running wheel (8-14 weeks of age, n=8-13). **D)** 24-hours time course of EE in the light and the dark phase of WT and SMNKO male mice with access to a running wheel (8-14 weeks of age, n=8-13). **E)** ANCOVA analysis with EE in the light and dark phase as the dependent variable and body weight as a covariant for WT and SMNKO male mice with access to a running wheel, (8-14 weeks of age, n=8-13). The analysis showed that genotype significantly affected EE independently of body weight in the dark phase. **F)** Food intake in the light and the dark phase of WT and SMNKO male mice with access to a running wheel (8-14 weeks of age, n=8-13). **G)** ANCOVA analysis with food intake in the light and dark phase as the dependent variable and body weight as a covariant for WT and SMNKO male mice with access to a running wheel, (8-14 weeks of age, n=8-13). The analysis showed that genotype significantly affected food intake independently of body weight in the dark phase. **H)** Heatmap of RNA sequencing data from gastrocnemius muscle of WT and SMNKO mice at 2, 4, 6, and 8 weeks of age (n= 2-6). **I)** Gene set enrichment analysis of genes differentially expressed between genotypes and separated by age. The biological pathways were manually clustered into main pathways (n= 2-6). Normalized enrichment score (NES). Error bars represent SEM. \* Difference to WT control of the same light phase.

**E)** ANCOVA analysis with EE in the light and dark phase as the dependent variable and body weight as a covariant for WT and SMNKO male mice with access to a running wheel, (8-14 weeks of age, n=8-13). The analysis showed that genotype significantly affected EE independently of body weight in the dark phase. **F)** Food intake in the light and the dark phase of WT and SMNKO male mice with access to a running wheel (8-14 weeks of age, n=8-13). **G)** ANCOVA analysis with food intake in the light and dark phase as the dependent variable and body weight as a covariant for WT and SMNKO male mice with access to a running wheel, (8-14 weeks of age, n=8-13). The analysis showed that genotype significantly affected food intake independently of body weight in the dark phase. **H)** Heatmap of RNA sequencing data from gastrocnemius muscle of WT and SMNKO mice at 2, 4, 6, and 8 weeks of age (n= 2-6). **I)** Gene set enrichment analysis of genes differentially expressed between genotypes and separated by age. The biological pathways were manually clustered into main pathways (n= 2-6). Normalized enrichment score (NES). Error bars represent SEM. \* Difference to WT control of the same light phase.

# Figure S4

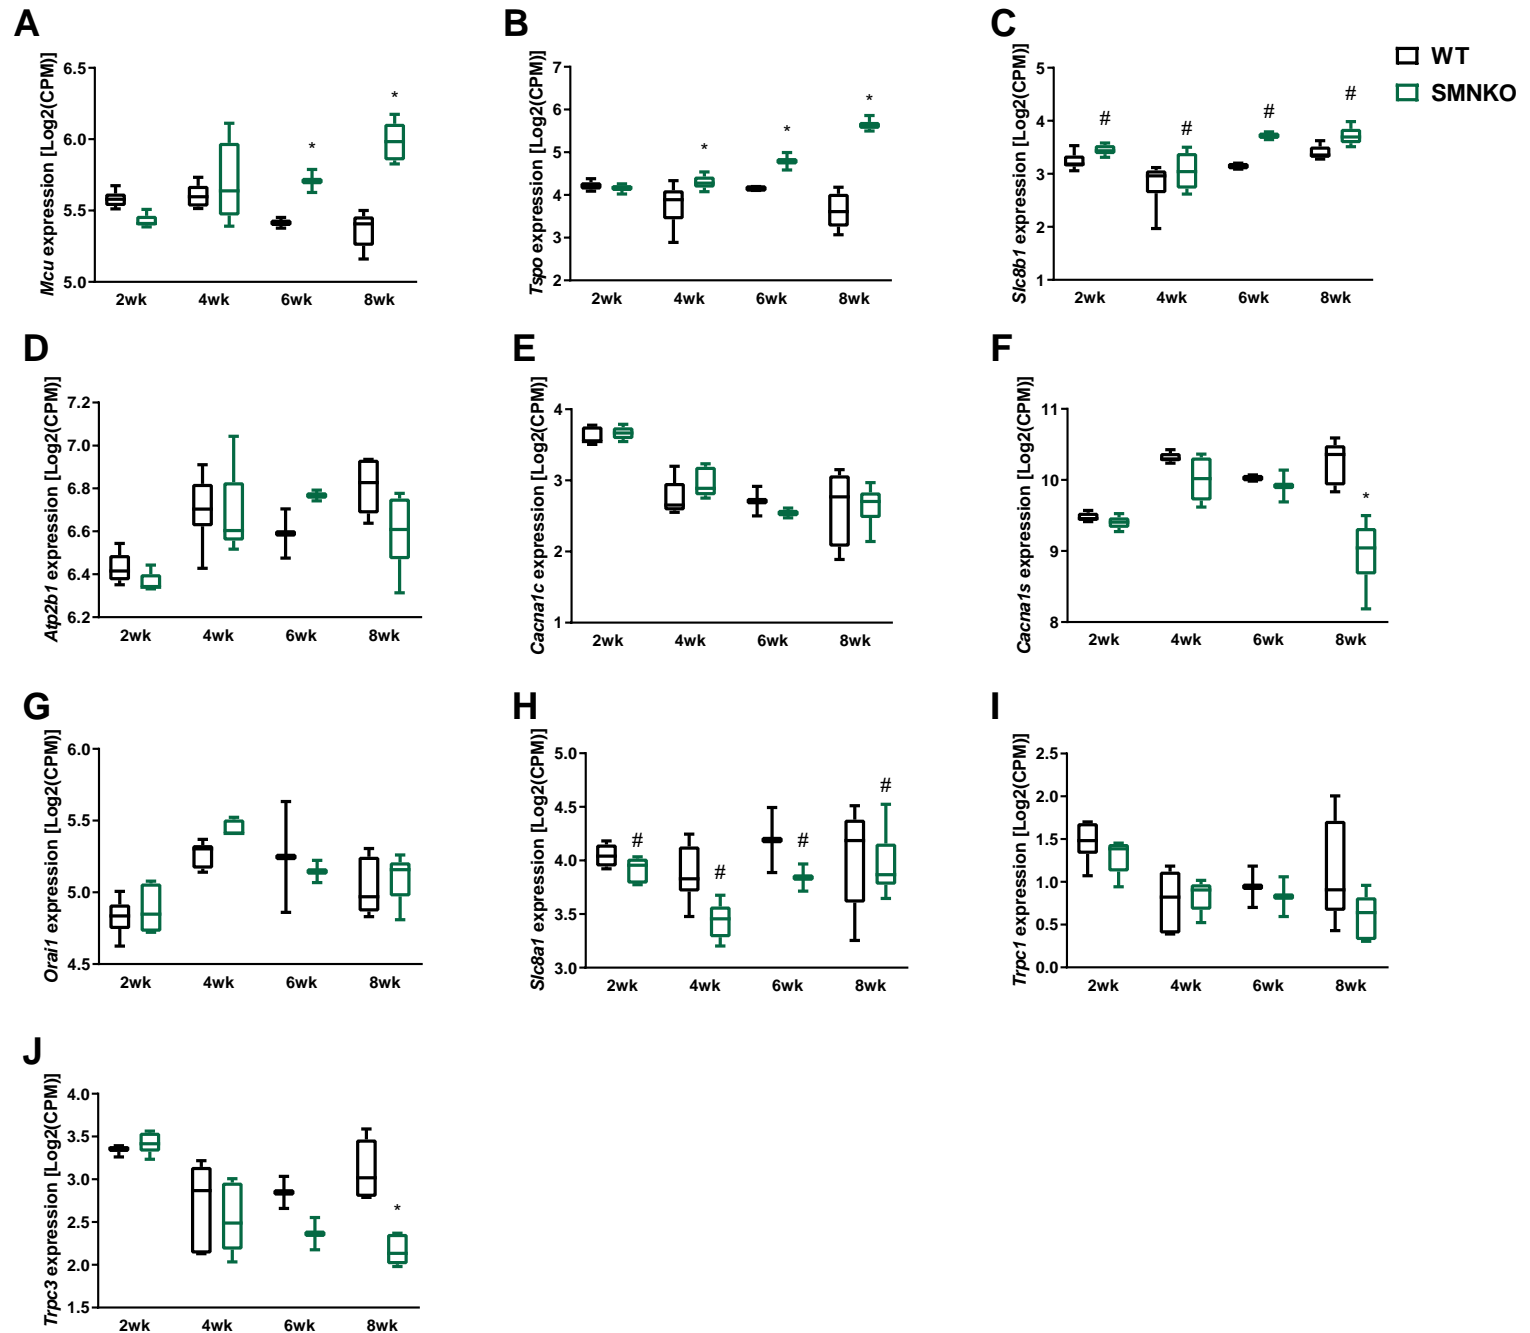

**Figure S4: Expression of mPTP related genes and Ca<sup>2+</sup>-transporters in SMNKO mice.** **A-C)** Expression based on RNA sequencing data of mitochondria permeability transition pore (mPTP) related proteins: Mitochondrial Calcium Uniporter (*Mcu*) (A), Translocator protein (*Tspo*) (B), and Solute Carrier Family 8 Member B1 (*Slc8B1*) (C) on gastrocnemius muscle of WT and SMNKO mice (n= 2-6). **D-J)** Expression based on RNA sequencing data of Ca<sup>2+</sup>-transporters connected to the sarcolemma: ATPase plasma membrane Ca<sup>2+</sup> transporting 1 (*Atp2b1*) (D), Ca<sup>2+</sup> voltage-gated channel subunit  $\alpha$ 1 C (*Cacna1c*) (E), Ca<sup>2+</sup> voltage-gated channel subunit  $\alpha$ 1 S (*Cacna1s*) (F), Ca<sup>2+</sup> release-activated Ca<sup>2+</sup> channel protein 1 (*Orai1*) (G), Solute carrier family 8 member A1 (*Slc8a1*) (H), Transient receptor potential cation channel subfamily C member 1 (*Trpc1*) (I), Transient receptor potential cation channel subfamily C member 3 (*Trpc3*) (J) in gastrocnemius muscle of WT and SMNKO mice (n= 2-6). Box plot: boxes extend from the 25th to 75th percentiles and the whiskers represent the smallest to the largest value. \* Difference to WT control of the same age. # Main effect of genotype.

# Figure S5

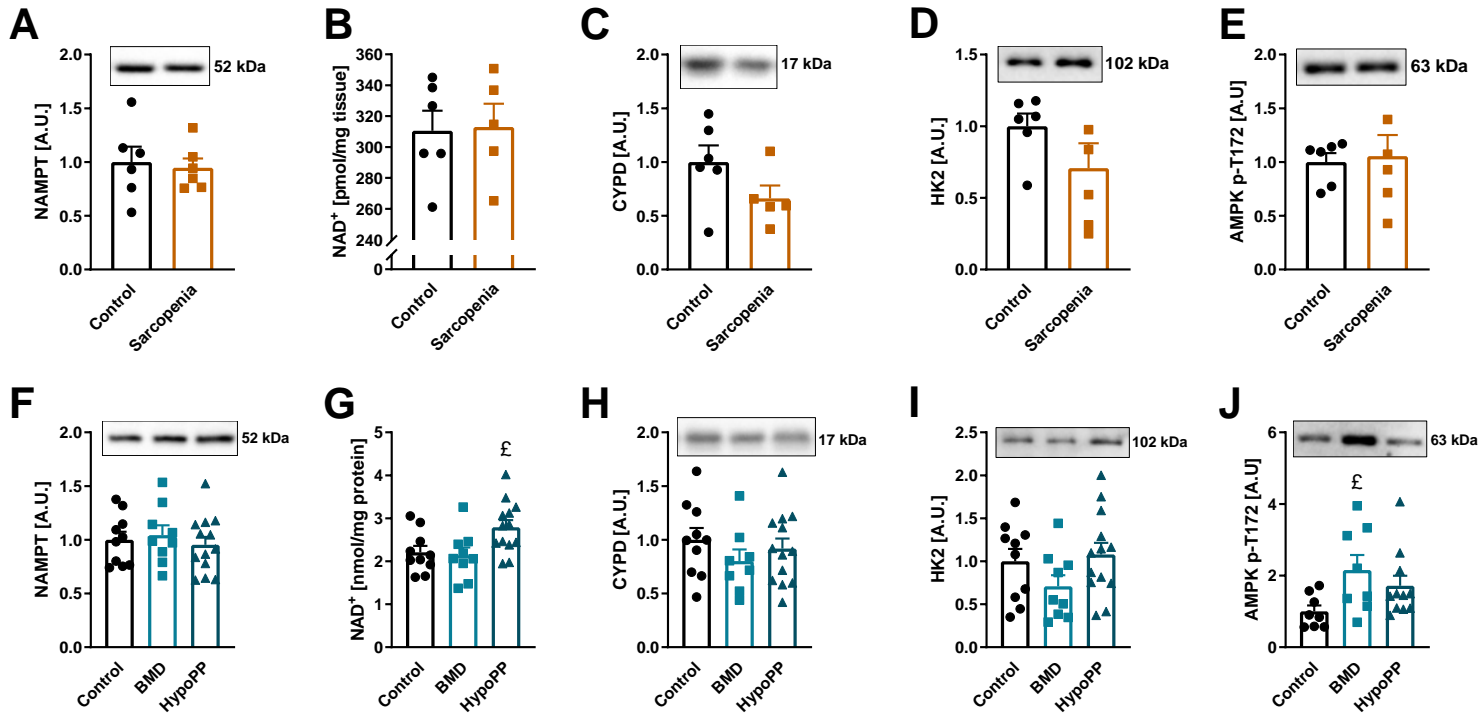

**Figure S5: NAMPT and NAD<sup>+</sup> levels in human myopathies.** **A-B**) NAMPT (A) and NAD<sup>+</sup> (B) levels in human control and sarcopenic muscle (n=5-6) taken from individuals with sarcopenia (age: 85-93 years of age, total appendicular lean mass normalized to height <6.94 kg/m<sup>2</sup> for men and <5.33 kg/m<sup>2</sup> for women) or from age-matched healthy controls (age: 83-88 years of age, total appendicular lean mass normalized to height >8.16 kg/m<sup>2</sup> for men and >5.90 kg/m<sup>2</sup> for women). **C-E**) CYPD (C), HK2 (D), and AMPK-pT172 (E) protein levels in human control and sarcopenic muscle (n=5-6). **F-G**) NAMPT (F) and NAD<sup>+</sup> (G) levels in muscle biopsies of controls and patients with Becker muscular dystrophy (BMD) or Hypokalemic periodic paralysis (HypoPP) (n= 9-13). **H-J**) CYPD (H), HK2 (I), and AMPK-pT172 (J) protein levels in muscle biopsies of controls and patients with Becker muscular dystrophy (BMD) and Hypokalemic periodic paralysis (HypoPP) (n= 9-13). Error bars represent SEM. £ p<0.05 compared to controls.

# Figure S6

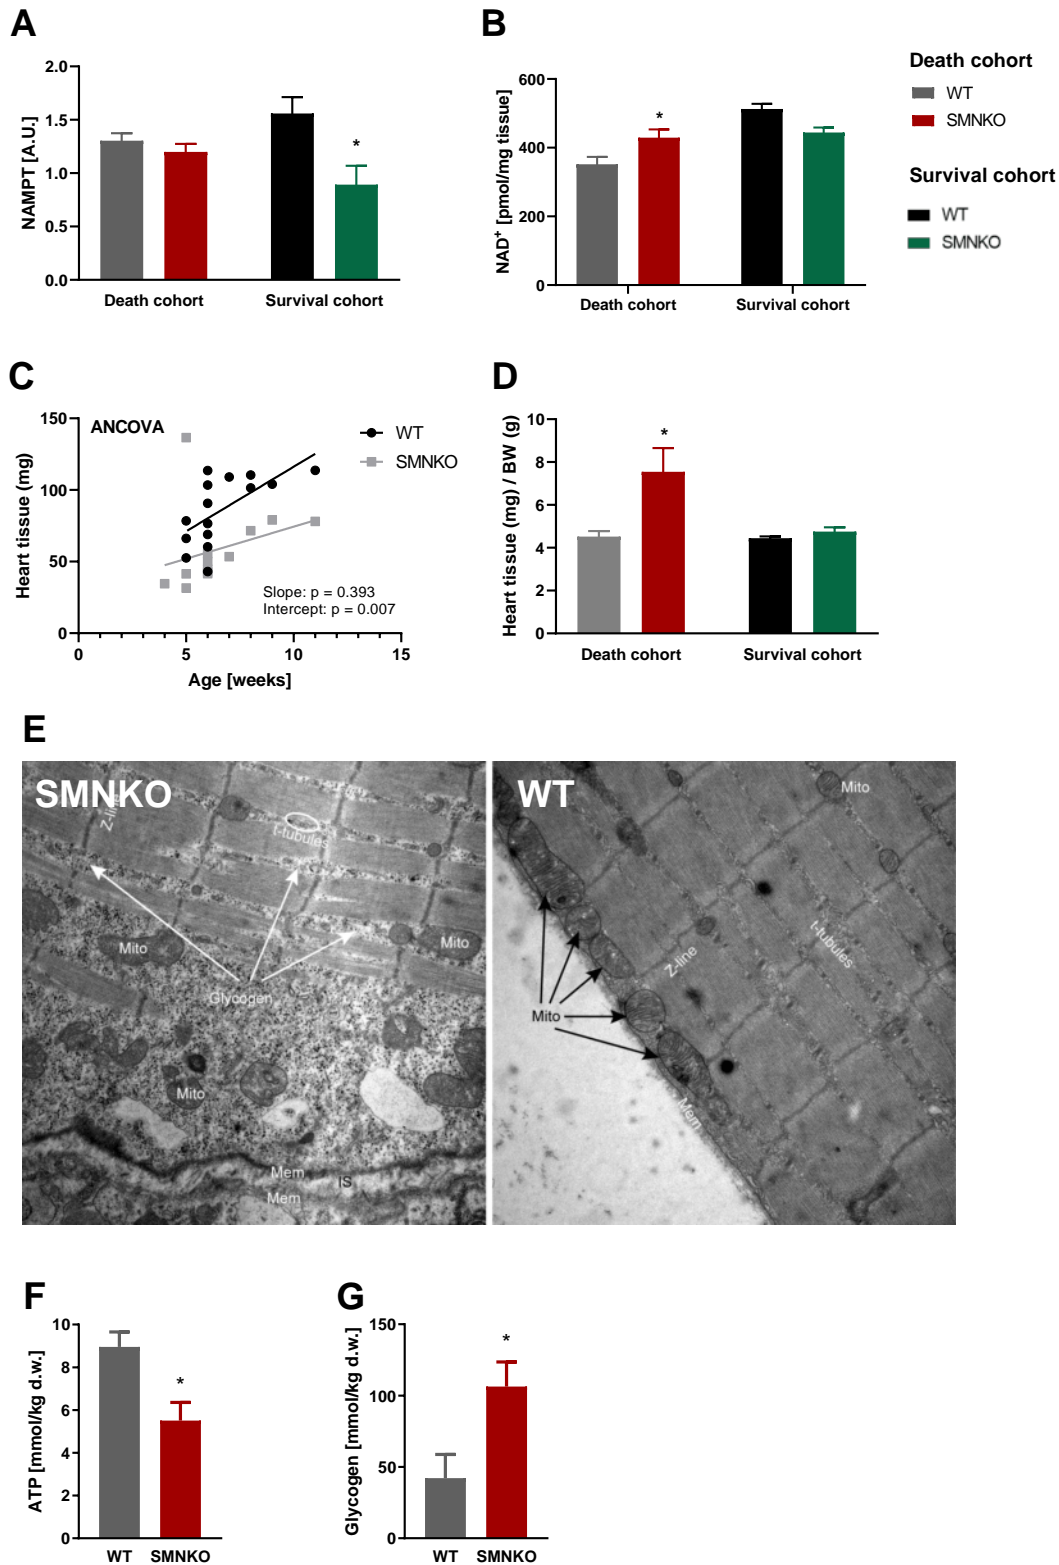

**Figure S6: Glycogen accumulation in SMNKO muscle. A and B)** NAMPT protein abundance (A) and  $\text{NAD}^+$  levels (B) in cardiac tissue of WT and SMNKO mice sacrificed just before natural death of the SMNKO mice (Death cohort, 4-11 weeks of age,  $n=15$ ), and in male WT and SMNKO mice (Survival cohort, 9-14 weeks of age,  $n=8-13$ ). **C and D)** Heart tissue weight as a function of age (C) and heart tissue weight normalized to bodyweight (D) in WT and SMNKO mice (Death cohort, 4-11 weeks of age,  $n=15$  and Survival cohort, 9-14 weeks of age,  $n=8-13$ ). **E)** Left: Glycogen accumulates in the subsarcolemmal space, between and in the interior of myofibrils from SMNKO mice causing them to break up longitudinally, splitting the Z-line (IS: interstitial space between myofibers; Mem: membrane; Mito: mitochondria). White arrows: glycogen; Black arrows: mitochondria). Right: Myofibrils from WT muscle. **F)** ATP and **G)** glycogen levels in diaphragm muscle of WT and SMNKO mice sacrificed just before natural death of the SMNKO mice (Death cohort, 4-11 weeks of age,  $n=11$ ).

## Supplementary Table 1

| <b>SYMBOL</b>         | <b>FULL NAME</b>                                     | <b>P-VALUE</b> | <b>FDR</b> | <b>DIRECTION</b>         | <b>FUNCTION</b>                                                                      |
|-----------------------|------------------------------------------------------|----------------|------------|--------------------------|--------------------------------------------------------------------------------------|
| <b><i>Gm10800</i></b> | Predicted gene 10800                                 | 2,39E-13       | 3,59E-09   | Up<br>(wk: 2, 4, 6, 8)   | Unknown                                                                              |
| <b><i>Nampt</i></b>   | Nicotinamide phosphoribosyl-transferase              | 6,59E-11       | 4,96E-07   | Down<br>(wk: 2, 4, 6, 8) | Enzyme in the NAD salvage pathway.                                                   |
| <b><i>Gm10801</i></b> | Predicted gene 10801                                 | 2,14E-10       | 1,07E-06   | Up<br>(wk: 2, 4, 6, 8)   | Unknown                                                                              |
| <b><i>Chrna9</i></b>  | Cholinergic receptor, nicotinic, alpha polypeptide 9 | 9,19E-07       | 0,00346    | Up<br>(wk: 2, 4, 6, 8)   | Ligand-gated plasma membrane channel for divalent cations. B and T cell related.     |
| <b><i>Gm5083</i></b>  | Predicted gene 5083                                  | 1,38E-06       | 0,00348    | Up<br>(wk:2)             | Unknown                                                                              |
| <b><i>Gm21738</i></b> | Predicted gene, 21738                                | 1,39E-06       | 0,00348    | Up<br>(wk: 2, 4, 6, 8)   | Unknown                                                                              |
| <b><i>Acs14</i></b>   | Acyl-CoA synthetase long-chain family member 4       | 2,27E-06       | 0,00489    | Down<br>(wk: 2, 4)       | Convert arachidonate into fatty acyl-CoA esters. Regulates PGE <sub>2</sub> release. |
| <b><i>Rps6ka6</i></b> | Ribosomal protein S6 kinase polypeptide 6            | 1,31E-05       | 0,02473    | Down<br>(wk:2)           | Constitutively active growth-factor-independent kinase.                              |
| <b><i>Rnf128</i></b>  | Ring finger protein 128                              | 1,69E-05       | 0,02834    | Down<br>(wk: 2, 4, 6, 8) | Involved in the endocytic pathway. Related to anergic T cells.                       |
| <b><i>Ppif</i></b>    | Cyclophilin D                                        | 3,28E-05       | 0,04542    | Up<br>(wk: 2, 4, 6, 8)   | Major component of the mitochondrial permeability transition pore.                   |
| <b><i>Pter</i></b>    | Phosphotriesterase related                           | 3,32E-05       | 0,04542    | Down<br>(wk: 2, 4, 8)    | Mediates renal injury in response to urinary protein.                                |

## Supplementary Table 2

Content of purified NR enriched diet.

| <b>Composition</b>                   | <b>Grams</b> | <b>Kcal %</b> |
|--------------------------------------|--------------|---------------|
| Protein                              | 19           | 20            |
| Carbohydrate                         | 67           | 70            |
| Fat                                  | 4            | 10            |
| Total                                |              | 100           |
| Calorie/gram                         | 3.8          |               |
| <b>Ingredients</b>                   | <b>Grams</b> | <b>Kcal</b>   |
| Casein                               | 200          | 800           |
| L-cysteine                           | 3            | 12            |
| Corn starch                          | 506.2        | 2025          |
| Maltodextrin 10                      | 125          | 500           |
| Sucrose                              | 68.8         | 275           |
| Cellulose, BW200                     | 50           | 0             |
| Soybean oil                          | 25           | 225           |
| Lard                                 | 20           | 180           |
| Mineral mix S10026                   | 10           | 0             |
| Dicalcium phosphate                  | 13           | 0             |
| Calcium carbonate                    | 5.5          | 0             |
| Potassium citrate, 1H <sub>2</sub> O | 16.5         | 0             |
| Vitamin mix V10001                   | 10           | 40            |
| Choline bitartrate                   | 2            | 0             |
| Nicotinamide riboside                | 1            | 2             |
| <b>Total</b>                         | <b>1056</b>  | <b>4057</b>   |
